# Supplementary material for: Xanthohumol overcomes osimertinib resistance via governing ubiquitination-modulated Ets-1 turnover
Source: PubMed Central journal article supplement (PMC11519634; doi:10.1038/s41420-024-02220-y), 2024-10-28

Full gel for Figure 1

C

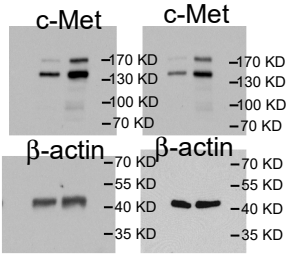

D

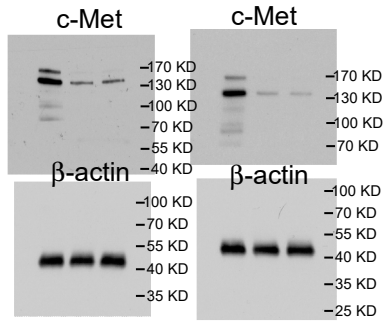

Full gel for Figure 3

B

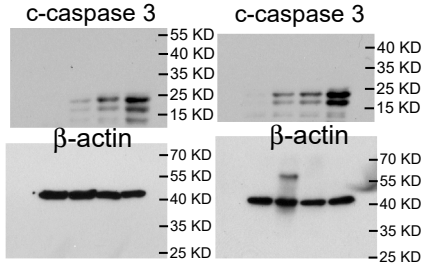

F

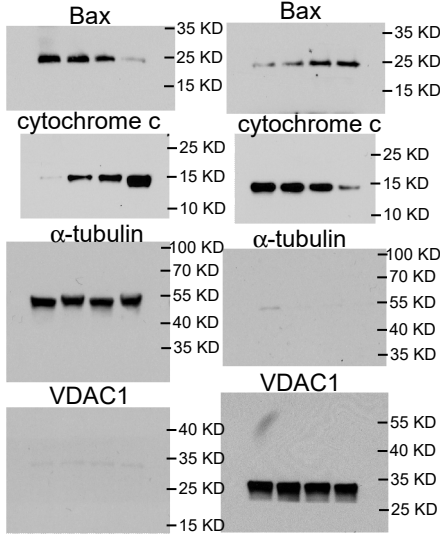

Full gel for Figure 4

A

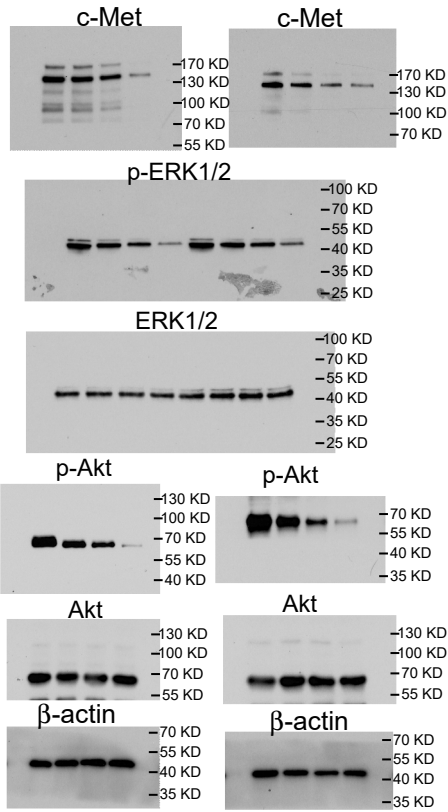

C

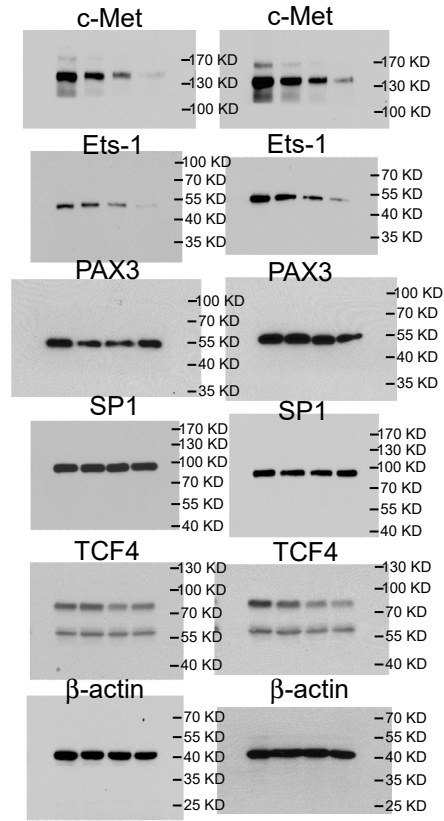

D

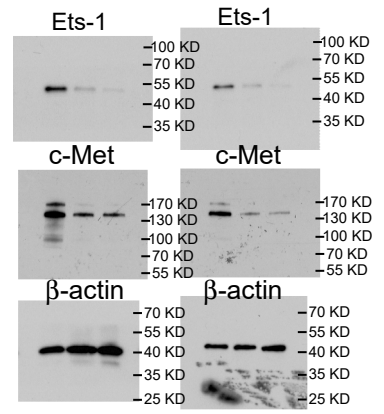

E

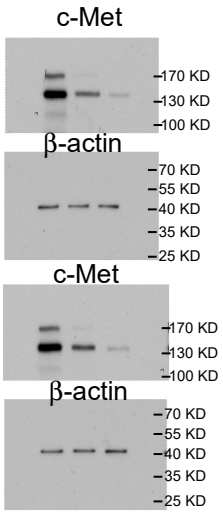

F

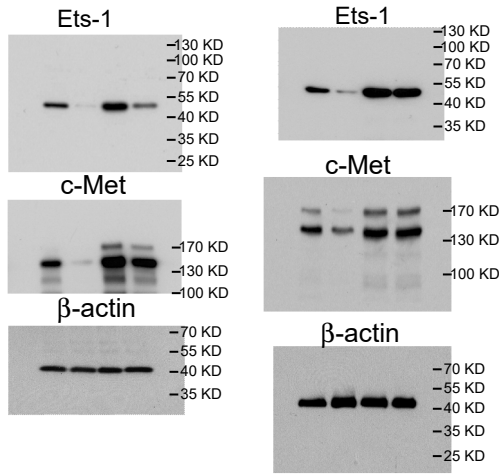

**B**

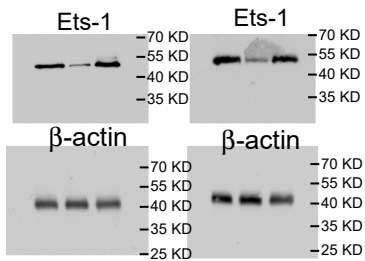

**C**

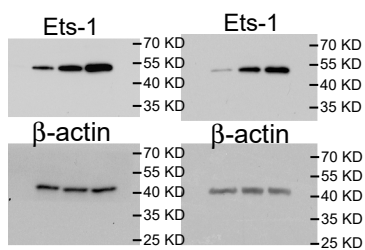

**D**

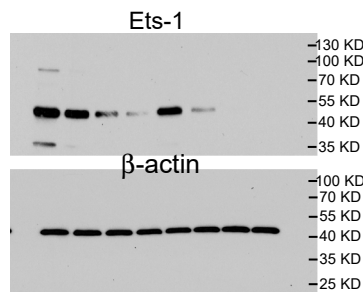

**E**

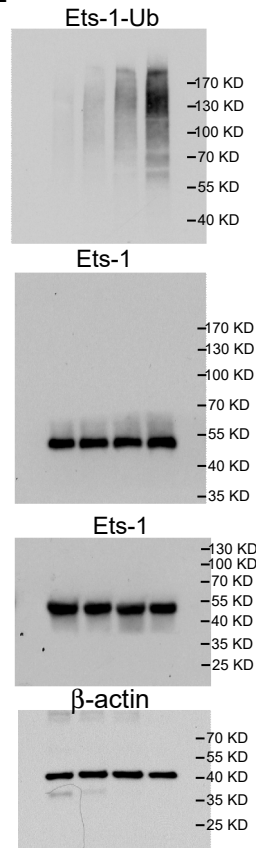

**F**

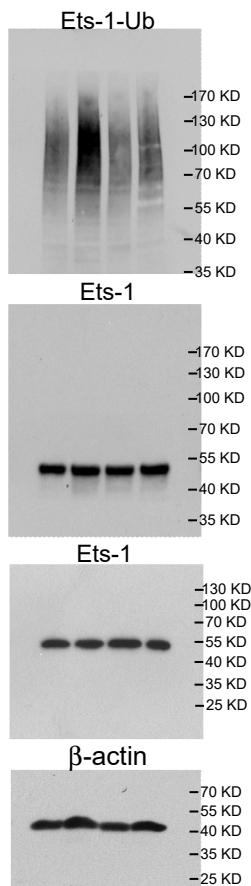

**G**

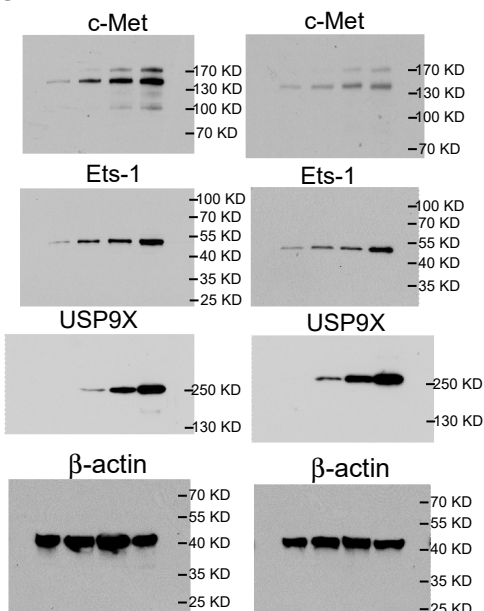

**H**

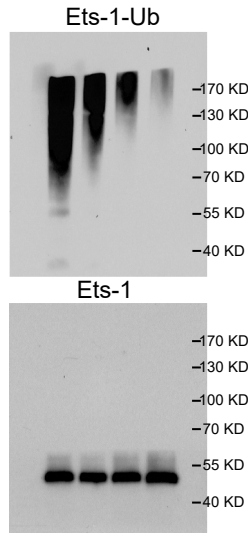

**J**

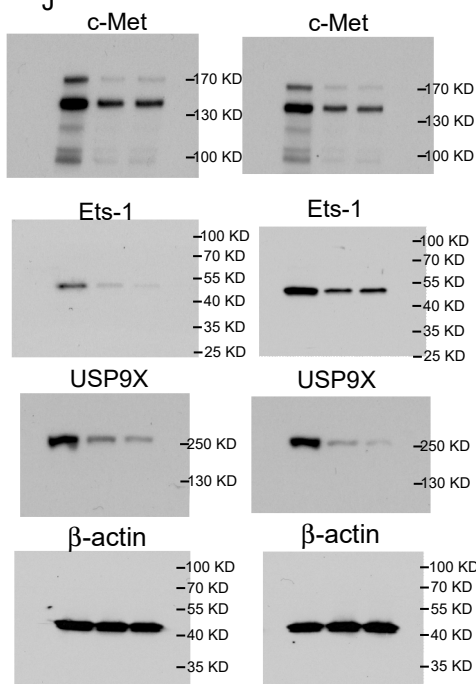

**K**

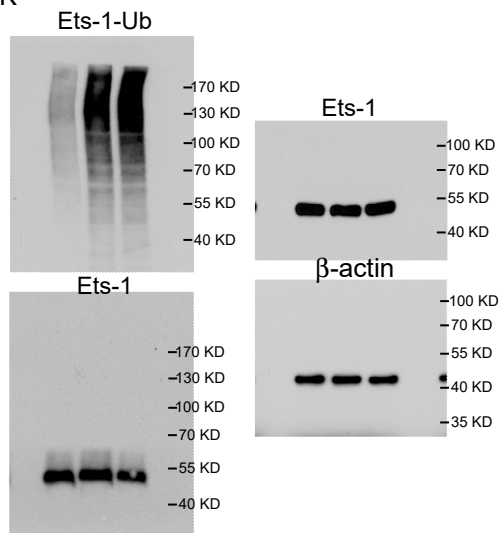

**L**

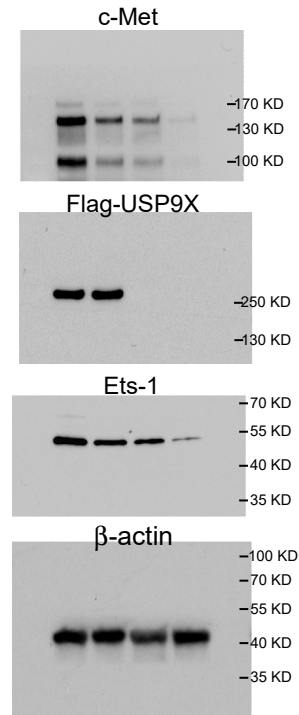

Full gel for Figure 6

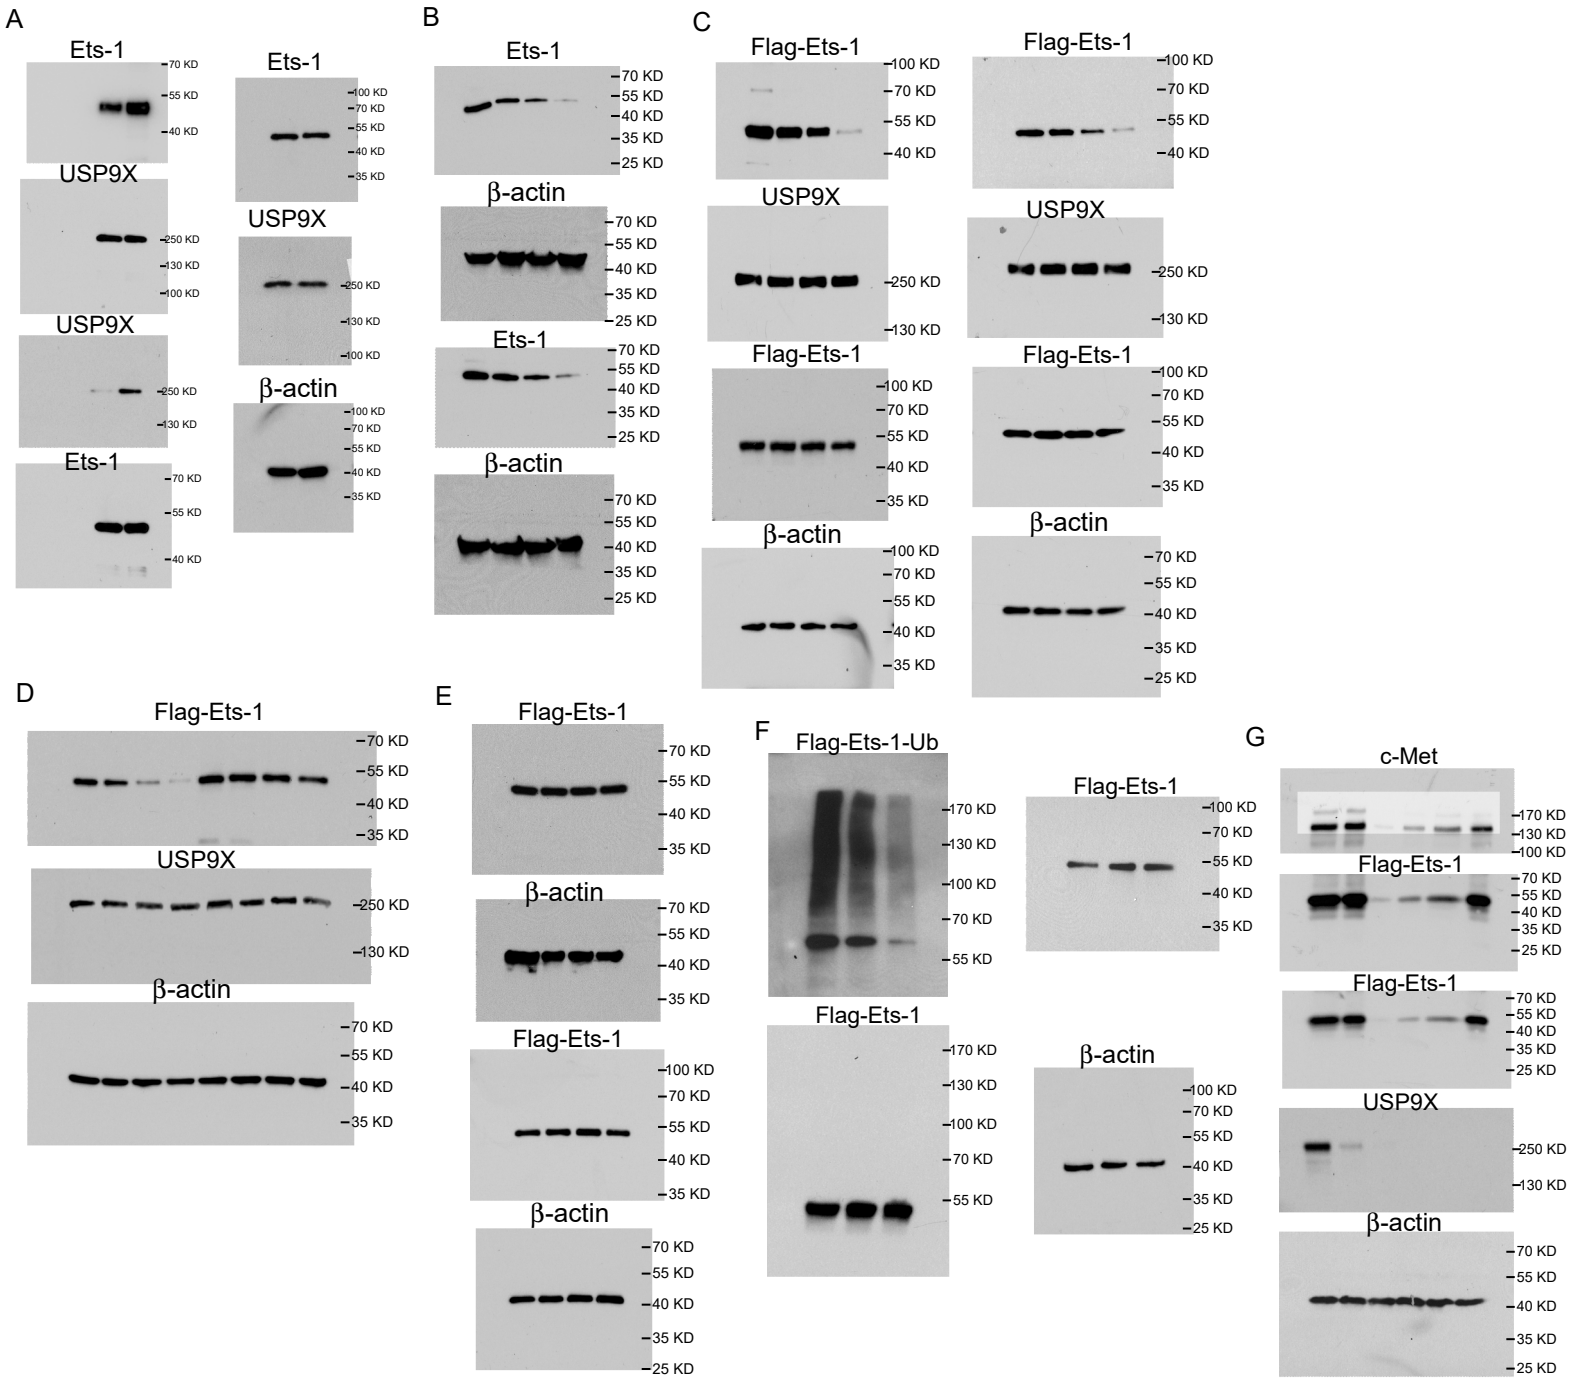

Full gel for Figure 8

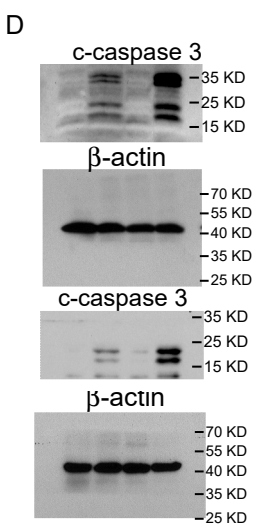

Supplement: 41420_2024_2220_MOESM1_ESM.pdf [file 41420_2024_2220_MOESM1_ESM.pdf]
